# Supplementary material
Source: Springer Nature journal article supplement (https://www.springermedizin.de/resource/supplementary/12992_2006_28_MOESM4_ESM.pdf/9616296)

## Value of Pacific Island Tuna Catch by Fishing Nation (1998)

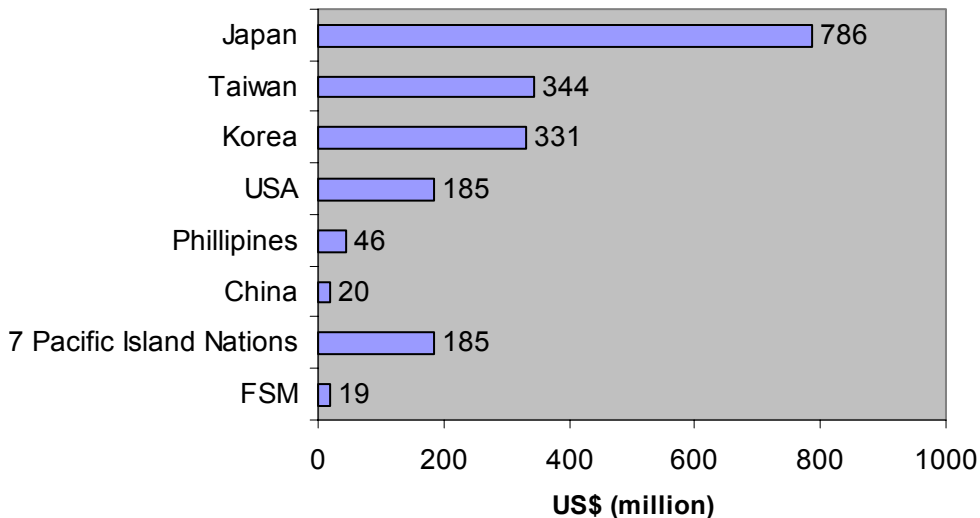

Supplement: MOESM4 [file 9616296]
